# Supplementary material
Source: Springer Nature journal article supplement (https://www.springermedizin.de/resource/supplementary/12889_2014_6919_MOESM2_ESM.pdf/9499272)

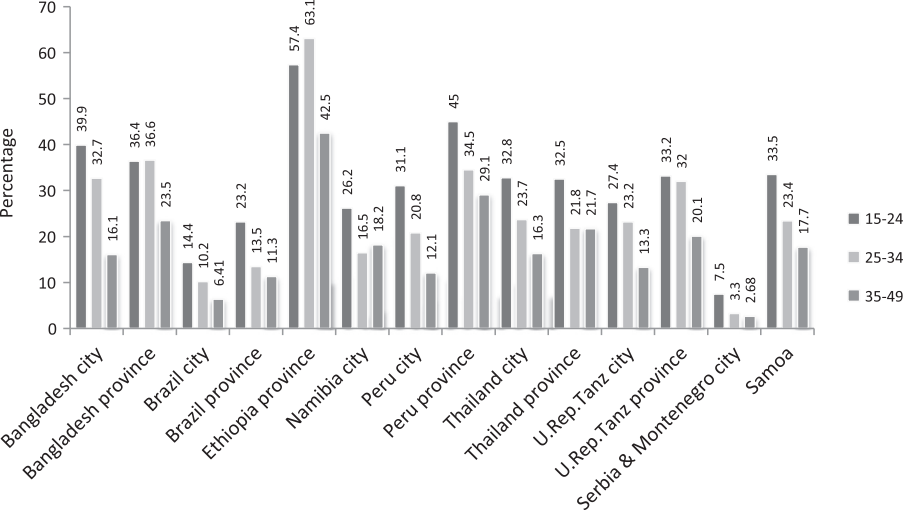

Supplement: MOESM2 [file 9499272]
